# Supplementary material
Source: PubMed Central journal article supplement (PMC2670033)
Supplement: tjp0587-0139-SD1.pdf [file tjp0587-0139-SD1.pdf]

**Supplemental Figures for MS ID#: JPHYSIOL/2008/160093**

**Title:**

Agonist- and antagonist-induced conformational changes of loop F and their contributions to the  $\rho 1$  GABA receptor function

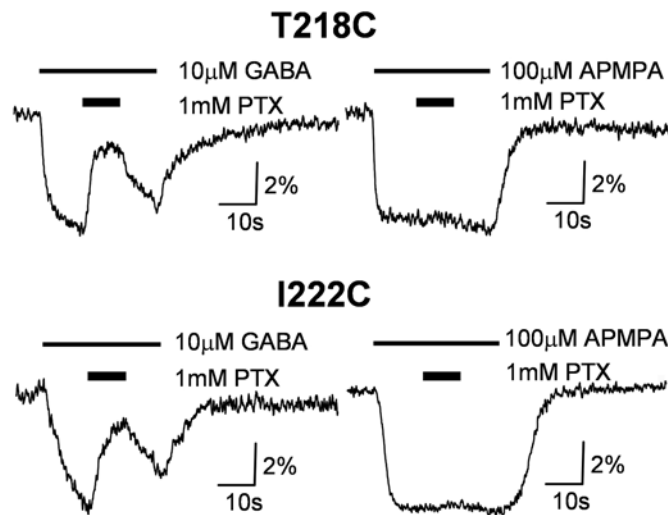

**Supplemental Figure 1. 3-APMPA-induced fluorescence changes were picrotoxin resistant.**

In T218C and I222C mutants, the picrotoxin-sensitivity of the GABA-induced fluorescence changes was reconfirmed in the left panels. However, the same concentration of picrotoxin failed to block the 3-APMPA-induced fluorescence changes in the right panel for both mutants ( $n \geq 3$  for each case).

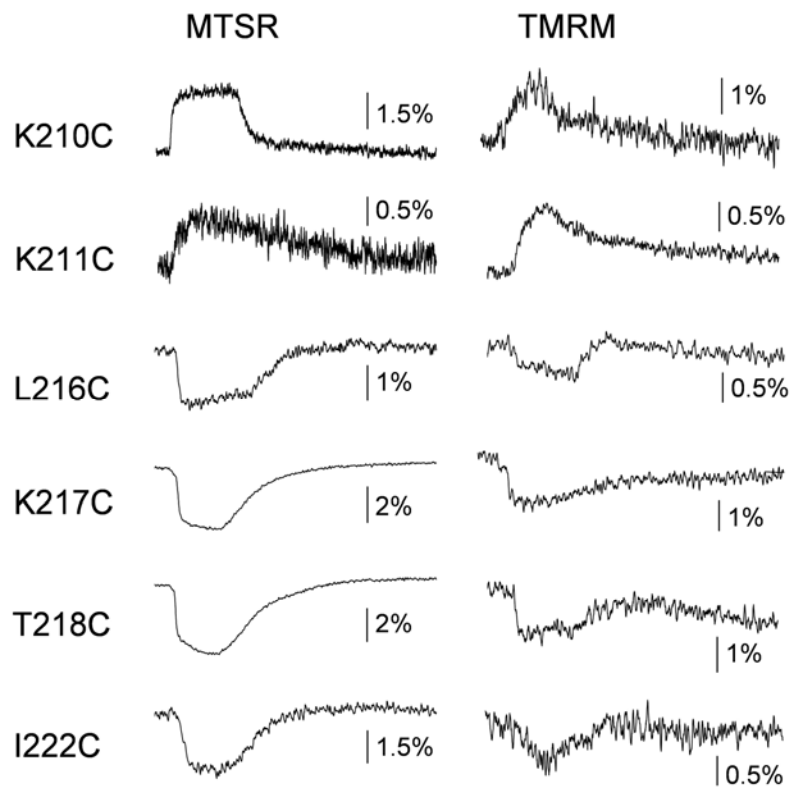

**Supplemental Figure 2. Comparison of the GABA-induced fluorescence signals in MTSR and TMRM labeled oocytes expressing different mutants.** The GABA-induced fluorescence changes were also detected in the TMRM-labeled oocytes expressing individual mutant receptors ( $n \geq 3$  for each mutant). The direction of fluorescence changes with TMRM labeling was the same as with MTSR labeling for all six mutants. However, with TMRM labeling, the amplitude of fluorescence changes in lower four mutants were smaller when compared to those with MTSR labeling.
